# Supplementary material for: Spatial heterogeneity of physicochemical properties explains differences in microbial composition in arid soils from Cuatro Cienegas, Mexico
Source: PubMed Central journal article supplement (PMC5018672; doi:10.7717/peerj.2459), 2016-09-08

Figure S3. Cluster dendrogram of similar microbial communities from the TRFLPs profiles of the four studied quadrats (*A*: 3 samples; *B*: 3 samples; *C*: 7 samples; *D*: 8 samples) using Bray-Curtis dissimilarity distances and the Ward's hierarchical clustering algorithm.

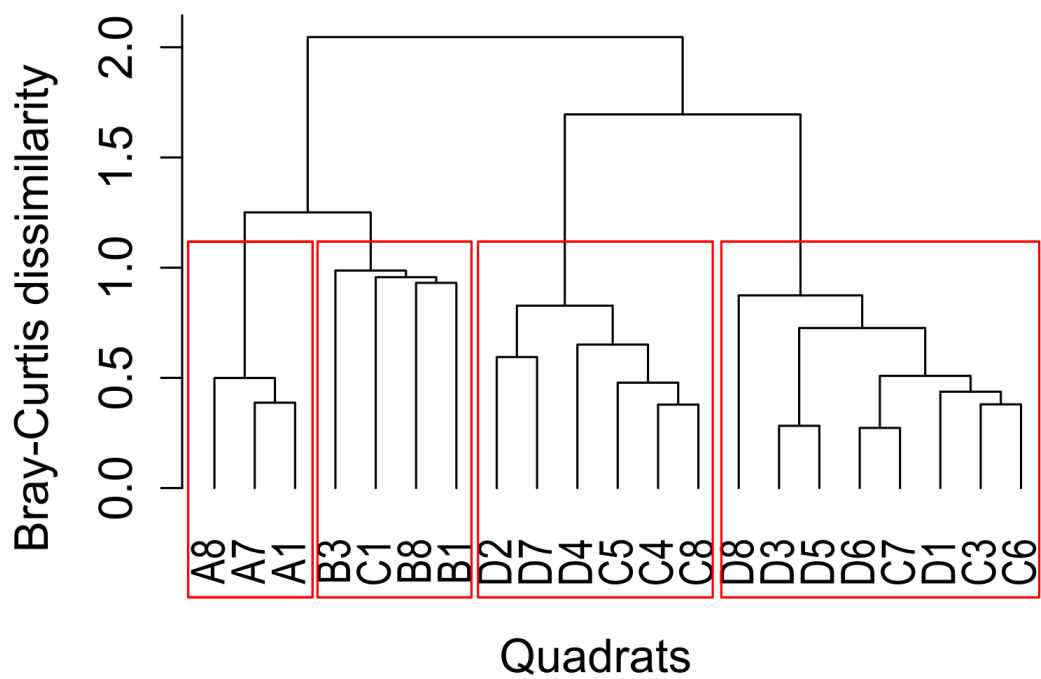

Supplement: peerj-04-2459-s004.pdf [file peerj-04-2459-s004.pdf]
