# Supplementary material for: Spatial heterogeneity of physicochemical properties explains differences in microbial composition in arid soils from Cuatro Cienegas, Mexico
Source: PubMed Central journal article supplement (PMC5018672; doi:10.7717/peerj.2459), 2016-09-08
Supplement: peerj-04-2459-s005.pdf [file peerj-04-2459-s005.pdf]

## SUPPLEMENTARY MATERIAL

Table S1. Pearson correlation coefficients among different soil parameters from the four quadrants within the Churince system in the Cuatro Ciénegas Basin (Mexico).

|                                    | TC     | TN       | C:N     | TP       | NH <sub>4</sub> <sup>+</sup> | NO <sub>3</sub> <sup>-</sup> | DOC     | DON      | DOC:NOD | DOP    | pH      | CE      | Mg <sup>2+</sup> | Ca <sup>2+</sup> | Na <sup>+</sup> | K <sup>+</sup> | HCO <sub>3</sub> <sup>-</sup> | Cl <sup>-</sup> | SO <sub>4</sub> <sup>2-</sup> |  |
|------------------------------------|--------|----------|---------|----------|------------------------------|------------------------------|---------|----------|---------|--------|---------|---------|------------------|------------------|-----------------|----------------|-------------------------------|-----------------|-------------------------------|--|
| <b>TC</b>                          | 1      |          |         |          |                              |                              |         |          |         |        |         |         |                  |                  |                 |                |                               |                 |                               |  |
| <b>TN</b>                          | 0.194  | 1        |         |          |                              |                              |         |          |         |        |         |         |                  |                  |                 |                |                               |                 |                               |  |
| <b>C:N</b>                         | 0.335  | -0.788** | 1       |          |                              |                              |         |          |         |        |         |         |                  |                  |                 |                |                               |                 |                               |  |
| <b>TP</b>                          | 0.178  | -0.001   | 0.071   | 1        |                              |                              |         |          |         |        |         |         |                  |                  |                 |                |                               |                 |                               |  |
| <b>NH<sub>4</sub><sup>+</sup></b>  | -0.201 | -0.513** | 0.421*  | -0.062   | 1                            |                              |         |          |         |        |         |         |                  |                  |                 |                |                               |                 |                               |  |
| <b>NO<sub>3</sub><sup>-</sup></b>  | 0.050  | -0.494** | 0.479** | 0.197    | 0.414*                       | 1                            |         |          |         |        |         |         |                  |                  |                 |                |                               |                 |                               |  |
| <b>DOC</b>                         | 0.299  | 0.112    | -0.049  | 0.278    | -0.073                       | -0.045                       | 1       |          |         |        |         |         |                  |                  |                 |                |                               |                 |                               |  |
| <b>DON</b>                         | 0.073  | 0.460*   | -0.278  | -0.221   | -0.251                       | -0.324                       | -0.123  | 1        |         |        |         |         |                  |                  |                 |                |                               |                 |                               |  |
| <b>DOC:NOD</b>                     | 0.067  | -0.232   | 0.104   | 0.244    | 0.266                        | 0.130                        | 0.616** | -0.734** | 1       |        |         |         |                  |                  |                 |                |                               |                 |                               |  |
| <b>DOP</b>                         | 0.052  | 0.031    | -0.030  | -0.582** | 0.036                        | -0.365                       | -0.075  | 0.221    | -0.032  | 1      |         |         |                  |                  |                 |                |                               |                 |                               |  |
| <b>pH</b>                          | 0.009  | 0.190    | -0.167  | 0.504**  | -0.134                       | 0.054                        | 0.310   | 0.161    | -0.015  | -0.205 | 1       |         |                  |                  |                 |                |                               |                 |                               |  |
| <b>CE</b>                          | 0.011  | -0.118   | 0.097   | -0.193   | 0.189                        | 0.038                        | 0.155   | 0.084    | -0.071  | 0.244  | 0.241   | 1       |                  |                  |                 |                |                               |                 |                               |  |
| <b>Mg<sup>2+</sup></b>             | 0.192  | 0.137    | -0.021  | 0.383*   | -0.007                       | 0.001                        | 0.428*  | -0.105   | 0.225   | -0.066 | 0.554** | 0.524** | 1                |                  |                 |                |                               |                 |                               |  |
| <b>Ca<sup>2+</sup></b>             | 0.410* | 0.278    | -0.074  | 0.432*   | -0.340                       | -0.061                       | 0.161   | 0.392*   | -0.288  | -0.313 | 0.202   | 0.000   | 0.198            | 1                |                 |                |                               |                 |                               |  |
| <b>Na<sup>+</sup></b>              | 0.009  | -0.002   | -0.071  | 0.533**  | 0.121                        | 0.055                        | 0.345   | 0.030    | 0.090   | -0.368 | 0.567** | 0.358   | 0.606**          | 0.367            | 1               |                |                               |                 |                               |  |
| <b>K<sup>+</sup></b>               | 0.282  | 0.012    | 0.146   | 0.386*   | 0.157                        | 0.265                        | 0.259   | 0.063    | 0.000   | -0.190 | 0.330   | 0.276   | 0.652**          | 0.488*           | 0.510**         | 1              |                               |                 |                               |  |
| <b>HCO<sub>3</sub><sup>-</sup></b> | -0.211 | -0.398*  | 0.348   | -0.324   | 0.385*                       | 0.063                        | -0.094  | -0.300   | 0.200   | 0.224  | -0.293  | -0.083  | -0.430*          | -0.558**         | -0.290          | -0.388*        | 1                             |                 |                               |  |
| <b>Cl<sup>-</sup></b>              | -0.243 | -0.322   | 0.267   | -0.373   | 0.305                        | -0.048                       | -0.109  | -0.225   | 0.174   | 0.327  | -0.261  | -0.073  | -0.425*          | -0.646**         | -0.470*         | -0.507**       | 0.956**                       | 1               |                               |  |
| <b>SO<sub>4</sub><sup>2-</sup></b> | -0.304 | -0.183   | 0.140   | -0.328   | 0.266                        | -0.075                       | -0.210  | -0.045   | 0.029   | 0.285  | -0.166  | -0.009  | -0.451*          | -0.619**         | -0.402*         | -0.650**       | 0.763**                       | 0.876**         | 1                             |  |

Same acronyms as indicated before.

\*: Correlation is significant at the 0.05 level (2-tailed).

\*\*: Correlation is significant at the 0.01 level (2-tailed).
