# Supplementary material for: Spatial heterogeneity of physicochemical properties explains differences in microbial composition in arid soils from Cuatro Cienegas, Mexico
Source: PubMed Central journal article supplement (PMC5018672; doi:10.7717/peerj.2459), 2016-09-08
Supplement: peerj-04-2459-s006.pdf [file peerj-04-2459-s006.pdf]

Table S2. Results of statistical analysis (p-values) for the two primary principal components (PCs) score related to the biogeochemical parameters.

|                               | PC1      | PC2      | r <sup>2</sup> | Pr (>r)     |
|-------------------------------|----------|----------|----------------|-------------|
| TC                            | -0.98694 | -0.1611  | 0.1233         | 0.205794    |
| TN                            | -0.48554 | 0.87421  | 0.6359         | 0.000999*** |
| C:N                           | 0.35451  | -0.93505 | 0.4719         | 0.001998**  |
| TP                            | -0.82747 | -0.56151 | 0.5066         | 0.000999*** |
| NH <sub>4</sub>               | 0.46797  | -0.88374 | 0.4752         | 0.000999*** |
| NO <sub>3</sub>               | 0.00021  | -1       | 0.391          | 0.000999*** |
| DOC                           | -0.74922 | -0.66232 | 0.2479         | 0.031968*   |
| DON                           | -0.31693 | 0.94845  | 0.5128         | 0.000999*** |
| DOC:NOD                       | 0.11516  | -0.99335 | 0.3917         | 0.003996**  |
| DOP                           | 0.7989   | 0.60147  | 0.232          | 0.033966*   |
| pH                            | -0.96627 | -0.25752 | 0.327          | 0.00999**   |
| CE                            | -0.66237 | -0.74917 | 0.0732         | 0.40959     |
| Mg <sup>2+</sup>              | -0.88973 | -0.45649 | 0.5688         | 0.000999*** |
| Ca <sup>2+</sup>              | -0.97013 | 0.24259  | 0.5736         | 0.000999*** |
| Na <sup>+</sup>               | -0.87376 | -0.48636 | 0.5452         | 0.000999*** |
| K <sup>2+</sup>               | -0.89145 | -0.45312 | 0.6021         | 0.000999*** |
| HCO <sub>3</sub> <sup>-</sup> | 0.94794  | -0.31845 | 0.7406         | 0.000999*** |
| Cl <sup>-</sup>               | 0.98365  | -0.18008 | 0.7713         | 0.000999*** |
| SO <sub>4</sub> <sup>2-</sup> | 0.99998  | 0.00602  | 0.671          | 0.000999*** |
| Exp. Var.                     | 54.29%   | 34.32%   |                |             |

Exp. Var.: Explained variance.

Significance codes: \*\*\*, 0.001; \*\*, 0.01; \*, 0.05.

P values based on 1000 permutations.
