# Supplementary material for: Spatial heterogeneity of physicochemical properties explains differences in microbial composition in arid soils from Cuatro Cienegas, Mexico
Source: PubMed Central journal article supplement (PMC5018672; doi:10.7717/peerj.2459), 2016-09-08
Supplement: peerj-04-2459-s007.pdf [file peerj-04-2459-s007.pdf]

Table S3. Results of statistical analysis (p-values) of the detrended correspondence analysis (DCA) for the two ordination scores related to the biogeochemical parameters.

|                               | <b>DCA1</b> | <b>DCA2</b> | <b>r<sup>2</sup></b> | <b>Pr (&gt;r)</b>     |
|-------------------------------|-------------|-------------|----------------------|-----------------------|
| TC                            | -0.37529    | 0.92691     | 0.1138               | 0.25974               |
| TN                            | -0.90475    | 0.42594     | 0.2365               | 0.042957*             |
| C:N                           | 0.99081     | 0.13525     | 0.1449               | 0.137862              |
| TP                            | -0.7869     | -0.61708    | 0.0547               | 0.480519              |
| NH <sub>4</sub>               | 0.90437     | -0.42674    | 0.1038               | 0.288711              |
| NO <sub>3</sub>               | 0.88946     | -0.45702    | 0.1302               | 0.183816              |
| DOC                           | -0.81726    | 0.57626     | 0.1014               | 0.301698              |
| DON                           | -0.98655    | 0.16345     | 0.2349               | 0.057942 <sup>+</sup> |
| DOC:NOD                       | 0.95595     | 0.29352     | 0.0763               | 0.400599              |
| DOP                           | 0.98925     | 0.14625     | 0.0165               | 0.846154              |
| pH                            | -1          | -0.00071    | 0.072                | 0.414585              |
| CE                            | -0.04894    | -0.9988     | 0.0047               | 0.955045              |
| Mg <sup>2+</sup>              | -0.8232     | -0.56775    | 0.0796               | 0.35964               |
| Ca <sup>2+</sup>              | -0.99461    | -0.10368    | 0.3667               | 0.006993**            |
| Na <sup>+</sup>               | -0.54688    | -0.83721    | 0.0805               | 0.381618              |
| K <sup>2+</sup>               | -0.89132    | -0.45337    | 0.3119               | 0.014985*             |
| HCO <sub>3</sub> <sup>-</sup> | 0.88152     | 0.47215     | 0.5533               | 0.000999***           |
| Cl <sup>-</sup>               | 0.87362     | 0.48661     | 0.4973               | 0.000999***           |
| SO <sub>4</sub> <sup>2-</sup> | 0.87661     | 0.4812      | 0.6862               | 0.000999***           |

Significance codes: \*\*\*, 0.001; \*\*, 0.01; \*, 0.05; <sup>+</sup>, 0.1.

P values based on 1000 permutations.
