# Supplementary material for: Spatial heterogeneity of physicochemical properties explains differences in microbial composition in arid soils from Cuatro Cienegas, Mexico
Source: PubMed Central journal article supplement (PMC5018672; doi:10.7717/peerj.2459), 2016-09-08
Supplement: peerj-04-2459-s008.pdf [file peerj-04-2459-s008.pdf]

Table S4. Multiple linear regression model of the distribution of OTUs abundance in relation to the soil abiotic variables and the respective fit values (R-squared, p-value, vif and AIC).

Call:

lm(formula = log(OTUs) ~ log(DON) + Ca + K + log(SO4))

Residuals:

| Min      | 1Q       | Median  | 3Q      | Max     |
|----------|----------|---------|---------|---------|
| -0.45504 | -0.17456 | 0.07136 | 0.15599 | 0.38821 |

Coefficients:

|             | Estimate | Std. Error | t value | Pr(> t )     |
|-------------|----------|------------|---------|--------------|
| (Intercept) | 7.5194   | 1.0555     | 7.124   | 2.41e-06 *** |
| log(DON)    | 0.5895   | 0.1983     | 2.972   | 0.00899 **   |
| Ca          | -4.9182  | 1.2889     | -3.816  | 0.00152 **   |
| K           | -0.7555  | 0.2995     | -2.523  | 0.02261 *    |
| log(SO4)    | -0.6553  | 0.2022     | -3.241  | 0.00511 **   |

---

Signif. codes: 0 '\*\*\*' 0.001 '\*\*' 0.01 '\*' 0.05 '.' 0.1 ' ' 1

Residual standard error: 0.2763 on 16 degrees of freedom

Multiple R-squared: 0.5875, Adjusted R-squared: 0.4719

F-statistic: 5.467 on 4 and 16 DF, p-value: 0.005706

Shapiro-Wilk normality test:

data: resid(model)

W = 0.94164, p-value = 0.2348

Multicollinearity diagnostic using Variance Inflation Factor (VIF):

|     | log(DON) | Ca       | K        | log(SO4) |
|-----|----------|----------|----------|----------|
| VIF | 1.929899 | 2.160122 | 1.439595 | 1.741604 |

Akaike's information criterion (AIC): 11.869
