# Supplementary material for: Spatial heterogeneity of physicochemical properties explains differences in microbial composition in arid soils from Cuatro Cienegas, Mexico
Source: PeerJ. 2016 Sep 8;4:e2459. doi: 10.7717/peerj.2459 (PMC5018672; doi:10.7717/peerj.2459)
Supplement: Supplemental Information 1 [file peerj-04-2459-s001.xlsx]

## Sheet: Biochemical_data
#Biochemical raw data for all sites in the plot
SITE	TC (mg/g)	TN mg/g	C:N	TP mg/g	NH4+ (ug/g)	NO3 (ug/g)	DOC (ug/g)	DON (ug/g)	DOC:NOD	DOP (ug/g)	pH	CE (dSm-1)	Mg2+ (cmol kg-1)	Ca2+ (cmol kg-1)	Na+ (cmol kg-1)	K+ (cmol kg-1)	HCO3- (cmol kg-1)	Cl- (cmol kg-1)	SO4-2 (cmol kg-1)
A1	2.8	0.31	9.03	0.04	4.69	4.16	81.1	18.1	4.49	2.79	8.63	1.25	16.1	0.62	115.5	1.07	2.96	2.96	16.01
A2	1.5	0.59	2.53	0.02	4.51	0	121.3	15.7	7.74	7.09	8.67	1.39	31	0.52	140.9	1.01	2.98	2.98	16.15
A3	2.5	0.58	4.35	0.03	2.98	1.96	47.3	11.7	4.04	3.98	8.62	1.34	28.3	0.58	135.8	1.04	3.01	2.99	12.99
A4	1.3	0.67	1.95	0.03	3.88	2.16	85.6	17.5	4.88	0	8.71	1.46	30.7	0.52	148.9	1.07	2.59	2.66	15.35
A5	3.1	0.57	5.46	0.02	4.03	0.08	125.2	14.1	8.86	7.72	8.49	1.16	24.8	0.55	126.7	0.73	2.8	2.8	11.86
A6	NA	NA	NA	0.03	5.17	1.19	56.8	15.3	3.72	0	8.54	1.03	21.4	0.57	NA	NA	NA	NA	NA
A7	2.7	0.58	4.65	0.04	4.22	0	105.7	8.6	12.27	8.58	8.69	1.56	35.4	0.57	160.8	0.89	2.76	2.8	14.92
A8	3.2	0.72	4.45	0.04	3.85	4.34	114.9	16.7	6.86	0	8.85	1.38	30.2	0.54	154.5	0.82	2.44	2.54	18.64
B1	1.9	0.48	3.96	0.04	5.21	2.17	116.9	7.9	14.85	4.07	8.65	1.2	24.6	0.57	124.1	0.89	2.59	2.66	16.56
B2	2	0.59	3.4	0.02	3.78	0.08	50.1	8.3	6.03	7.92	8.78	1.28	26.6	0.56	142.2	0.75	2.01	2.2	14.85
B3	2.8	0.31	9.03	0.02	4.36	3.44	96.7	10	9.63	3.74	8.48	1.2	24.9	0.53	119.8	0.74	2.2	2.35	13.33
B4	2.4	0.5	4.8	0.03	3.83	1.2	50.1	8.3	6.03	4.06	8.72	1.28	24.6	0.54	142.8	0.74	2.26	2.4	13.46
B5	2.3	0.74	3.12	0.02	3.95	0	36.7	35.5	1.03	7.68	8.56	1.14	21.4	0.54	101.9	0.79	1.74	2.4	18.66
B6	2.3	0.57	4.06	0.03	3.17	0	111.6	16.8	6.65	7.81	8.73	2	38	0.54	120	0.61	1.64	2.5	19.51
B7	NA	NA	NA	0.03	4.1	1.2	59.1	35.7	1.66	6.62	8.53	NA	16	0.58	NA	0.61	1.64	NA	15.57
B8	2.8	0.2	14	0.04	5.24	3.42	59.3	12.6	4.7	3.62	8.69	1.59	35.7	0.55	139.1	1.21	3.34	3.26	18.57
C1	2.1	0.39	5.38	0.04	4.97	4.19	50.6	7.7	6.57	3.91	8.68	1.65	37.7	0.55	183.2	1.28	1.26	1.25	7.82
C2	3.4	0.59	5.76	0.04	3.99	0	134.2	38.2	3.51	7.44	8.77	1.56	36.8	0.56	152.3	NA	NA	NA	NA
C3	2.5	0.58	4.28	0.03	3.66	0.42	60.8	16.2	3.76	8.76	8.71	1.56	35.1	0.56	125.8	1.34	1.14	1.15	7.63
C4	3.2	0.7	4.55	0.03	4.03	0	113.7	12.6	9.05	0.03	8.59	1.54	37.5	0.58	142.2	1.36	1.49	1.42	7.63
C5	3	0.64	4.67	0.04	4.35	0.6	105.5	35.2	2.99	5.44	8.8	1.82	38.2	0.67	213.5	1.45	1.2	1.19	8.46
C6	2.2	0.64	3.42	0.04	4.42	4.01	46.9	20.6	2.27	0	8.57	1.4	30.5	0.69	153.9	1.2	0.94	0.54	7.24
C7	2.5	0.57	4.42	0.04	3.7	0.87	129.5	18.5	7.01	0	8.81	1.79	38.6	0.7	216.6	1.21	1.34	1.32	8.49
C8	3	0.58	5.21	0.04	3.13	1.3	74.1	14.7	5.05	0	8.66	1.24	27.6	0.71	130.4	1.02	0.9	0.54	6.26
D1	2.3	0.58	3.96	0.05	3.44	2.22	125	18.2	6.88	0	8.78	1.38	31.5	0.57	161.4	0.88	0.91	0.8	6.79
D2	2.8	0.71	3.97	0.06	3.42	2.08	105	10.8	9.7	0	8.84	0.72	40.1	0.62	145.1	1.29	0.9	1.16	6.12
D3	2.1	0.28	7.5	0.03	5.37	4.78	122.4	14.5	8.42	2.63	8.79	1.79	40	0.57	176.5	1.59	1.85	1.71	7.46
D4	3.3	0.54	6.12	0.03	3.21	3.93	149.8	12.4	12.1	8.63	8.7	1.61	37.9	0.58	134.7	1.42	1.46	1.41	7.51
D5	2.9	0.56	5.22	0.07	3.47	0.85	153.1	16.8	9.13	0	8.78	1.17	38.9	0.69	210.3	1.51	1.5	1.44	8.7
D6	2.7	0.66	4.07	0.03	2.08	0.6	95.1	34.7	0	3.96	8.69	1.3	28.7	0.74	129.2	1.13	1.15	1.15	6.22
D7	3.8	0.85	4.46	0.03	4.34	1.96	119.7	30.2	3.97	7.86	8.75	1.69	38.6	0.69	141.6	1.51	1.36	1.32	7.83
D8	1.9	0.6	3.17	0.08	3.21	3.93	95.1	19.3	4.93	0	8.84	1.5	40.1	0.73	156.4	1.29	1.15	1.16	7.83

## Sheet: Biochemical_ACP
#Bioquemical data input for stadistical analysis and principal component analysis
SITES	TC	TN	CN	TP	NH4	NO3	DOC	DON	DOCNOD	DOP	pH	CE	Mg	Ca	Na	K	HCO3	Cl	SO4
A1	2.8	0.31	9.03	0.04	4.69	4.16	81.1	18.1	4.49	2.79	8.63	1.25	16.1	0.62	115.5	1.07	2.96	2.96	16.01
A2	1.5	0.59	2.53	0.02	4.51	0	121.3	15.7	7.74	7.09	8.67	1.39	31	0.52	140.9	1.01	2.98	2.98	16.15
A3	2.5	0.58	4.35	0.03	2.98	1.96	47.3	11.7	4.04	3.98	8.62	1.34	28.3	0.58	135.8	1.04	3.01	2.99	12.99
A4	1.3	0.67	1.95	0.03	3.88	2.16	85.6	17.5	4.88	0	8.71	1.46	30.7	0.52	148.9	1.07	2.59	2.66	15.35
A5	3.1	0.57	5.46	0.02	4.03	0.08	125.2	14.1	8.86	7.72	8.49	1.16	24.8	0.55	126.7	0.73	2.8	2.8	11.86
A7	2.7	0.58	4.65	0.04	4.22	0	105.7	8.6	12.27	8.58	8.69	1.56	35.4	0.57	160.8	0.89	2.76	2.8	14.92
A8	3.2	0.72	4.45	0.04	3.85	4.34	114.9	16.7	6.86	0	8.85	1.38	30.2	0.54	154.5	0.82	2.44	2.54	18.64
B1	1.9	0.48	3.96	0.04	5.21	2.17	116.9	7.9	14.85	4.07	8.65	1.2	24.6	0.57	124.1	0.89	2.59	2.66	16.56
B3	2.8	0.31	9.03	0.02	4.36	3.44	96.7	10	9.63	3.74	8.48	1.2	24.9	0.53	119.8	0.74	2.2	2.35	13.33
B2	2	0.59	3.4	0.02	3.78	0.08	59.1	35.7	1.66	7.92	8.78	1.28	26.6	0.56	142.2	0.75	2.01	2.2	14.85
B4	2.4	0.5	4.8	0.03	3.83	1.2	50.1	8.3	6.03	4.06	8.72	1.28	24.6	0.54	142.8	0.74	2.26	2.4	13.46
B5	2.3	0.74	3.12	0.02	3.95	0	36.7	35.5	1.03	7.68	8.56	1.14	21.4	0.54	101.9	0.79	1.74	2.4	18.66
B6	2.3	0.57	4.06	0.03	3.17	0	111.6	16.8	6.65	7.81	8.73	2	38	0.54	120	0.61	1.64	2.5	19.51
B8	2.8	0.2	14	0.04	5.24	3.42	59.3	12.6	4.7	3.62	8.69	1.59	35.7	0.55	139.1	1.21	3.34	3.26	18.57
C1	2.1	0.39	5.38	0.04	4.97	4.19	50.6	7.7	6.57	3.91	8.68	1.65	37.7	0.55	183.2	1.28	1.26	1.25	7.82
C3	2.5	0.58	4.28	0.03	3.66	0.42	60.8	16.2	3.76	8.76	8.71	1.56	35.1	0.56	125.8	1.34	1.14	1.15	7.63
C4	3.2	0.7	4.55	0.03	4.03	0	113.7	12.6	9.05	0.03	8.59	1.54	37.5	0.58	142.2	1.36	1.49	1.42	7.63
C5	3	0.64	4.67	0.04	4.35	0.6	105.5	35.2	2.99	5.44	8.8	1.82	38.2	0.67	213.5	1.45	1.2	1.19	8.46
C6	2.2	0.64	3.42	0.04	4.42	4.01	46.9	20.6	2.27	0	8.57	1.4	30.5	0.69	153.9	1.2	0.94	0.54	7.24
C7	2.5	0.57	4.42	0.04	3.7	0.87	129.5	18.5	7.01	0	8.81	1.79	38.6	0.7	216.6	1.21	1.34	1.32	8.49
C8	3	0.58	5.21	0.04	3.13	1.3	74.1	14.7	5.05	0	8.66	1.24	27.6	0.71	130.4	1.02	0.9	0.54	6.26
D1	2.3	0.58	3.96	0.05	3.44	2.22	125	18.2	6.88	0	8.78	1.38	31.5	0.57	161.4	0.88	0.91	0.8	6.79
D2	2.8	0.71	3.97	0.06	3.42	2.08	105	10.8	9.7	0	8.84	0.72	40.1	0.62	145.1	1.29	0.9	1.16	6.12
D3	2.1	0.28	7.5	0.03	5.37	4.78	122.4	14.5	8.42	2.63	8.79	1.79	40	0.57	176.5	1.59	1.85	1.71	7.46
D4	3.3	0.54	6.12	0.03	3.21	3.93	149.8	12.4	12.1	8.63	8.7	1.61	37.9	0.58	134.7	1.42	1.46	1.41	7.51
D5	2.9	0.56	5.22	0.07	3.47	0.85	153.1	16.8	9.13	0	8.78	1.17	38.9	0.69	210.3	1.51	1.5	1.44	8.7
D6	2.7	0.66	4.07	0.03	2.08	0.6	95.1	34.7	0	3.96	8.69	1.3	28.7	0.74	129.2	1.13	1.15	1.15	6.22
D7	3.8	0.85	4.46	0.03	4.34	1.96	119.7	30.2	3.97	7.86	8.75	1.69	38.6	0.69	141.6	1.51	1.36	1.32	7.83

## Sheet: Biochemical_OTUs
#Biochemical data input for Detrended Correspondence Analysis of the TRFLPs profiles
SITES	TC	TN	CN	TP	NH4	NO3	DOC	DON	DOCNOD	DOP	pH	CE	Mg	Ca	Na	K	HCO3	Cl	SO4
A1	2.8	0.31	9.03	0.04	4.69	4.16	81.1	18.09	4.49	2.79	8.63	1.25	16.1	0.62	115.5	1.07	2.96	2.96	16.01
A7	2.7	0.58	4.65	0.04	4.22	0	105.7	8.61	12.27	8.58	8.69	1.56	35.4	0.57	160.8	0.89	2.76	2.8	14.92
A8	3.2	0.72	4.45	0.04	3.85	4.34	114.9	16.74	6.86	0	8.85	1.38	30.2	0.54	154.5	0.82	2.44	2.54	18.64
B1	1.9	0.48	3.96	0.04	5.21	2.17	116.9	7.87	14.85	4.07	8.65	1.2	24.6	0.57	124.1	0.89	2.59	2.66	16.56
B3	2.8	0.31	9.03	0.02	4.36	3.44	96.7	10.04	9.63	3.74	8.48	1.2	24.9	0.53	119.8	0.74	2.2	2.35	13.33
B8	2.8	0.2	14	0.04	5.24	3.42	59.3	12.61	4.7	3.62	8.69	1.59	35.7	0.55	139.1	1.21	3.34	3.26	18.57
C1	2.1	0.39	5.38	0.04	4.97	4.19	50.6	7.71	6.57	3.91	8.68	1.65	37.7	0.55	183.2	1.28	1.26	1.25	7.82
C3	2.5	0.58	4.28	0.03	3.66	0.42	60.8	16.16	3.76	8.76	8.71	1.56	35.1	0.56	125.8	1.34	1.14	1.15	7.63
C4	3.2	0.7	4.55	0.03	4.03	0	113.7	12.57	9.05	0.03	8.59	1.54	37.5	0.58	142.2	1.36	1.49	1.42	7.63
C5	3	0.64	4.67	0.04	4.35	0.6	105.5	35.25	2.99	5.44	8.8	1.82	38.2	0.67	213.5	1.45	1.2	1.19	8.46
C6	2.2	0.64	3.42	0.04	4.42	4.01	46.9	20.63	2.27	0	8.57	1.4	30.5	0.69	153.9	1.2	0.94	0.54	7.24
C7	2.5	0.57	4.42	0.04	3.7	0.87	129.5	18.48	7.01	0	8.81	1.79	38.6	0.7	216.6	1.21	1.34	1.32	8.49
C8	3	0.58	5.21	0.04	3.13	1.3	74.1	14.66	5.05	0	8.66	1.24	27.6	0.71	130.4	1.02	0.9	0.54	6.26
D1	2.3	0.58	3.96	0.05	3.44	2.22	125	18.17	6.88	0	8.78	1.38	31.5	0.57	161.4	0.88	0.91	0.8	6.79
D2	2.8	0.71	3.97	0.06	3.42	2.08	105	10.83	9.7	0	8.84	0.72	29	0.62	145.1	1.1	0.9	2	6.12
D3	2.1	0.28	7.5	0.03	5.37	4.78	122.4	14.54	8.42	2.63	8.79	1.79	40	0.57	176.5	1.59	1.85	1.71	7.46
D4	3.3	0.54	6.12	0.03	6	0	149.8	12.38	12.1	8.63	8.7	1.61	37.9	0.58	134.7	1.42	1.46	1.41	7.51
D5	2.9	0.56	5.22	0.07	3.47	0.85	153.1	16.76	9.13	0	8.78	1.17	38.9	0.69	210.3	1.51	1.5	1.44	8.7
D6	2.7	0.66	4.07	0.03	2.08	0.6	111	34.73	3.2	3.96	8.69	1.3	28.7	0.74	129.2	1.13	1.15	1.15	6.22
D7	3.8	0.85	4.46	0.03	4.34	1.96	119.7	30.17	3.97	7.86	8.75	1.69	38.6	0.69	141.6	1.51	1.36	1.32	4.89
D8	1.9	0.6	3.17	0.08	3.21	3.93	95.1	19.27	4.93	0	8.84	1.5	40.1	0.73	156.4	1.29	1.15	1.16	7.83

## Sheet: OTUs abundance
#OTUs abundance for each site or replicate
SITES	A	B	C	D	E	F	G	H	I	J	K	L	M	N	O	P	Q	R	S	T	U	V	W	X	Y	Z	AA	AB	AC	AD	AE	AF	AG	AH	AI	AJ	AK	AL	AM	AN	AO	AP	AG	AR	AS	AT	AU	AV	AW
A1	0	0	0	0	0	0	0	9876	0	0	0	763	1632	0	0	0	353	0	0	1405	1980	835	0	0	0	1649	0	1108	0	0	0	0	1225	0	0	0	0	0	772	0	0	0	0	0	0	2357	0	0	5441
A7	0	0	0	0	0	0	0	6375	0	0	0	0	2091	253	0	0	1565	0	0	1559	1784	344	0	0	0	1460	0	1129	0	0	0	0	663	0	0	0	0	0	1179	0	0	0	0	0	0	1139	0	0	3290
A8	0	0	0	0	0	0	0	7531	296	83	0	0	12258	0	0	0	3293	0	0	1052	3095	3644	0	0	0	749	186	1797	0	142	0	0	313	0	0	0	0	0	389	0	215	0	0	162	0	1358	0	0	2355
B1	0	0	0	0	0	0	0	7582	0	0	0	0	0	0	0	310	0	0	0	0	155	0	0	0	0	0	0	0	0	0	0	0	0	0	0	0	0	748	0	0	0	0	0	0	0	0	0	0	0
B3	0	0	0	0	0	0	0	2774	0	0	3478	0	0	0	420	0	359	0	0	134	0	479	0	0	0	0	0	0	0	252	275	0	0	0	0	0	0	0	0	0	0	0	0	0	0	0	0	0	0
B8	0	0	0	0	0	0	0	206	0	0	0	130	0	136	526	675	62	0	0	571	696	94	0	0	0	336	0	0	0	0	0	0	0	0	0	0	0	0	0	104	0	0	0	0	0	502	0	0	228
C1	0	0	0	0	0	0	11269	0	0	0	0	3726	0	644	0	1540	0	0	2230	0	930	4502	0	1224	0	2975	0	0	0	0	0	0	92	290	1072	0	0	0	0	0	0	242	0	0	960	136	0	4278	0
C3	0	0	0	0	0	0	0	2794	0	0	0	590	0	830	0	0	2360	0	0	612	451	3907	62	1981	0	266	0	733	73	0	0	0	0	0	0	3300	729	0	0	0	0	0	183	0	0	650	0	0	0
C4	0	0	0	0	0	0	0	992	0	0	0	780	624	0	253	234	881	0	0	501	768	2393	66	296	0	373	0	681	0	0	0	0	0	0	0	872	135	0	0	236	0	0	159	0	0	715	0	0	0
C5	0	0	0	0	0	322	0	1710	103	0	0	1508	10332	0	0	359	218	265	0	1180	1852	1116	0	0	0	692	0	1266	0	0	0	0	0	0	0	0	0	0	0	0	0	0	0	0	0	147	0	0	0
C6	0	0	0	0	0	0	0	1411	0	0	0	219	916	0	0	368	155	0	0	2465	655	2028	0	1004	0	170	0	865	0	0	0	0	0	0	0	1051	122	0	0	290	0	0	0	566	0	963	0	0	0
C7	0	0	0	0	0	151	0	2797	75	0	0	2762	6419	0	310	290	1923	0	0	3949	5352	5685	0	501	0	3900	0	796	0	0	0	0	0	0	0	190	0	0	0	481	0	295	0	0	0	338	0	0	0
C8	0	0	0	0	0	0	0	1153	0	0	0	0	276	0	150	0	584	0	0	241	413	879	0	387	0	231	0	0	0	0	0	69	0	0	0	301	0	0	0	0	0	0	0	0	0	0	0	0	0
D1	250	320	0	0	243	162	0	5469	0	0	0	1026	0	427	283	0	12111	0	0	982	757	4001	0	250	0	1361	0	119	205	0	0	0	0	0	0	1191	496	0	0	1110	0	0	170	902	0	1297	478	0	913
D2	0	0	304	0	698	0	0	1109	0	0	0	0	0	0	342	985	1024	0	0	230	312	0	360	0	0	211	276	0	0	0	0	0	0	0	0	0	0	0	0	0	0	0	0	0	0	0	0	0	243
D3	0	0	0	0	170	366	0	1772	0	0	0	258	0	0	583	528	96	0	0	2370	548	140	559	300	0	2524	0	1318	0	0	0	0	0	0	0	0	0	0	0	0	0	0	0	0	0	813	0	0	0
D4	0	0	0	0	223	0	0	463	0	0	41	5951	5178	0	536	0	2497	0	0	2806	4007	269	338	0	0	0	0	0	0	0	0	0	0	0	0	632	0	0	0	601	228	0	251	360	0	1784	0	0	0
D5	0	0	0	0	0	379	0	3207	114	0	0	331	968	60	181	0	7502	0	0	1146	969	358	0	229	179	1022	0	382	118	59	0	0	0	0	0	0	0	0	0	1597	0	0	0	0	0	628	0	0	0
D6	0	0	0	0	0	0	0	2502	64	0	0	6384	0	0	486	0	4436	0	0	4655	4595	2400	0	126	0	5609	0	137	0	0	0	0	0	0	0	1663	279	0	0	2921	224	0	140	0	0	1504	0	0	0
D7	0	0	0	0	0	0	0	1011	0	0	0	0	0	0	0	1436	163	0	0	0	0	587	0	0	0	0	0	0	0	0	0	0	0	0	0	317	0	0	0	0	0	0	0	0	0	0	0	0	0
D8	0	0	0	457	0	0	0	1074	0	0	0	1912	0	0	269	0	566	0	0	561	676	376	0	0	0	581	0	606	0	240	0	0	0	0	0	0	0	0	0	258	0	0	0	0	0	313	0	0	0
[truncated: 135 more columns]
